# Supplementary material
Source: PubMed Central journal article supplement (PMC10330542)
Supplement: NIHMS1904144-supplement-MMC1.pdf [file NIHMS1904144-supplement-MMC1.pdf]

## Supplementary Material for

X-linked hydrocephalus genes: their proximity to telomeres and high A+T content compared to Parkinson's disease

Madeline Hart<sup>1</sup>, Joshua Conrad<sup>1</sup>, Emma Barrett<sup>1</sup>, Kaitlyn Legg<sup>1</sup>,  
Gabrielle Ivey<sup>1</sup>, Peter H.U. Lee<sup>2,3</sup>, Yun Yung<sup>4</sup>, Joon W. Shim<sup>1\*</sup>

Correspondence to: [shim@marshall.edu](mailto:shim@marshall.edu)

### **This file includes:**

Figure S1 to S10;  
Tables S1a-c to S11a-c

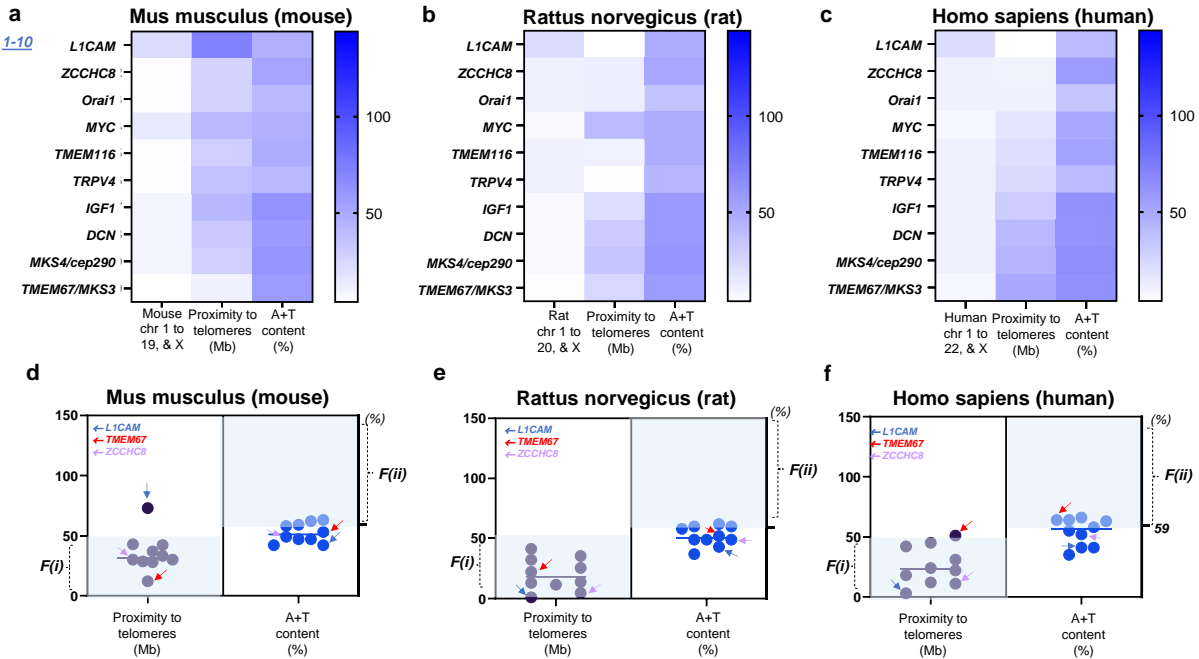

**Figure S1. Relative mutability of L1CAM driven by proximity to telomeres** (a) The color-coded map showing L1CAM and other genes by chromosome numbers (chr 1 to 19 and X), proximity to telomeres (Mb), and A+T content (%) in mus musculus (mouse). (b) The color-coded map showing L1CAM and other genes by chromosome numbers (chr 1 to 20 and X), proximity to telomeres (Mb), and A+T content (%) in rattus norvegicus (rat). (c) The color-coded map showing L1CAM and other genes by chromosome numbers (chr 1 to 22 and X), proximity to telomeres (Mb), and A+T content (%) in homo sapiens (human) (d) Scatter plots displaying relative mutability of ten mouse genes by proximity to telomeres (left) and A+T content (right). Shaded regions with light colors (blue) indicate genes satisfying either of the two factors. Genes outside the shaded regions at  $n=1$  by  $F(i)$ ;  $n=7$  by  $F(ii)$  are relatively less mutable. (e) Scatter plots displaying relative mutability of ten rat genes by proximity to telomeres (left) and A+T content (right). Shaded regions with light colors (blue) indicate genes satisfying either of the two factors. Genes outside the shaded regions at  $n=0$  by  $F(i)$ ;  $n=7$  by  $F(ii)$  are relatively less mutable. (f) Scatter plots displaying relative mutability of the same ten genes by proximity to telomeres (left) and A+T content (right) in human chromosomes. Shaded regions with light colors (blue) indicate genes satisfying either of the two factors. Genes outside the shaded regions at  $n=1$  by  $F(i)$ ;  $n=5$  by  $F(ii)$  are relatively less mutable. Note that all human genes except one satisfied proximity to telomeres,  $F(i)$ , while only a half (5 of 10) met  $F(ii)$ .

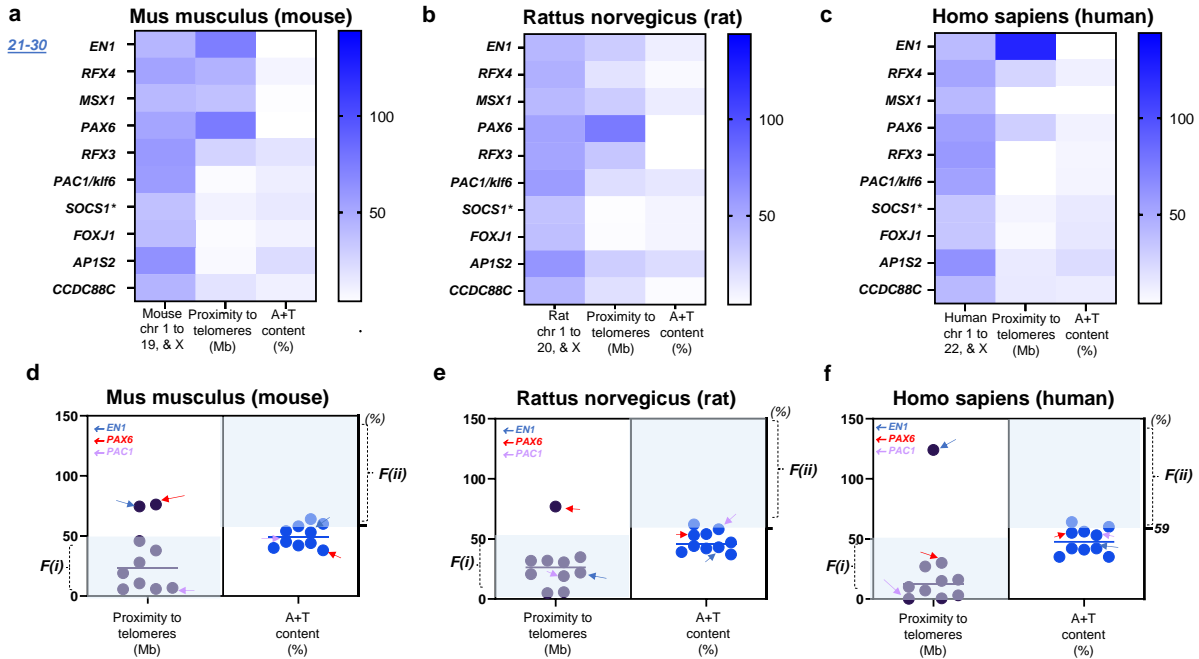

**Figure S2. Relative mutability of AP1S2 driven by the two factors, F(i) and F(ii)** (a) The color-coded map showing AP1S2 and other genes by chromosome numbers (chr 1 to 19 and X), proximity to telomeres (Mb), and A+T content (%) in mus musculus (mouse). (b) The color-coded map showing AP1S2 and other genes by chromosome numbers (chr 1 to 20 and X), proximity to telomeres (Mb), and A+T content (%) in rattus norvegicus (rat). (c) The color-coded map showing AP1S2 and other genes by chromosome numbers (chr 1 to 22 and X), proximity to telomeres (Mb), and A+T content (%) in homo sapiens (human) (d) Scatter plots displaying relative mutability of ten mouse genes by proximity to telomeres (left) and A+T content (right). Shaded regions with light colors (blue) indicate genes satisfying either of the two factors. Genes outside the shaded regions at  $n=2$  by F(i);  $n=7$  by F(ii) are relatively less mutable. (e) Scatter plots displaying relative mutability of ten rat genes by proximity to telomeres (left) and A+T content (right). Shaded regions with light colors (blue) indicate genes satisfying either of the two factors. Genes outside the shaded regions at  $n=1$  by F(i);  $n=9$  by F(ii) are relatively less mutable. (f) Scatter plots displaying relative mutability of the same ten genes by proximity to telomeres (left) and A+T content (right) in human chromosomes. Shaded regions with light colors (blue) indicate genes satisfying either of the two factors. Genes outside the shaded regions at  $n=1$  by F(i);  $n=9$  by F(ii) are relatively less mutable. Note that all human genes except one satisfied proximity to telomeres, F(i), while only two genes (2 of 10) met F(ii) at A+T content > 59%.

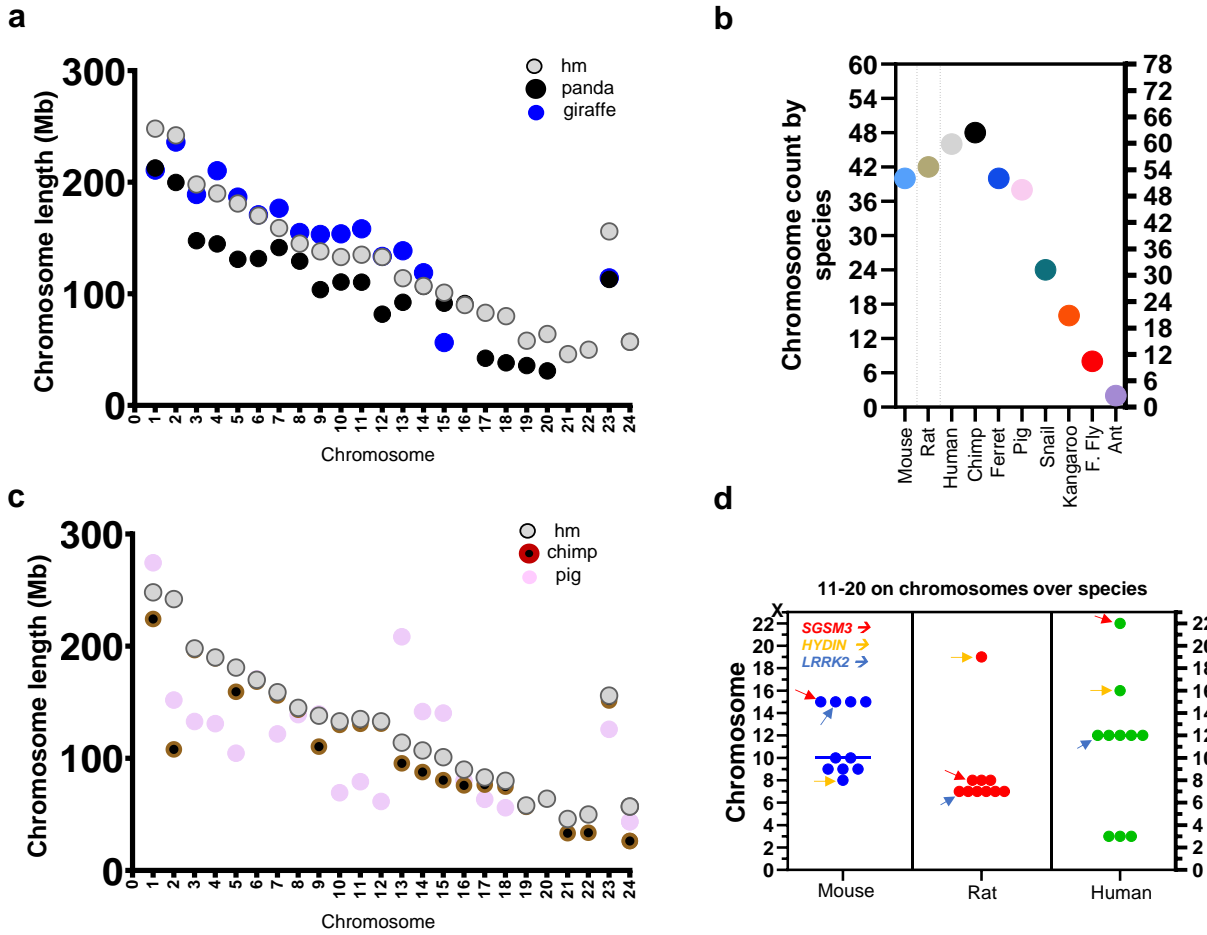

**Figure S3. Chromosome length and count in different species.** (a) Scatter plots showing chromosome length of three species with respect to each chromosome (chr) of chr 1 to X or Y; humans (hm), panda, and giraffe. Note that taller animals do not always show longer chromosomes. In chr 15, pandas and humans, which are smaller in body size, have longer nucleotide sizes than giraffes. x-axis is pair-wise; humans showing 23 pairs from chr 1 to chr X (plotted at 23 of x-axis) or Y (plotted at 24 of x-axis) (Morton, 1991). Note that panda and giraffe have 21 and 15 pairs of chromosomes, respectively. (b) Chromosome count of frequently used laboratory animals (mice & rats) and humans as compared to other species such as chimpanzees (chimp) to Ants. Note that chimp (48) and pig (38) have somewhat similar numbers to humans at 46 chromosomes (23 pairs) while snails are fewer at 24. (c) Scatter plots showing chromosome length of three species with respect to each chromosome of humans (hm), chimpanzee, and pig. Note that taller animals do not always show longer chromosomes. In chr 1, pigs, which are shorter in body size, have longer nucleotide sizes than humans and chimps. x-axis is pairwise; humans showing 23 pairs from chr 1 to chr X (plotted at 23 of x-axis) or Y (plotted at 24 of x-axis). (d) Chromosome number of ten (a set of #11-20) genes associated with CH over three species of mice, rats, and humans. Note that all three genes of SGSM3, HYDIN, and LRRK2 are located on different autosomes depending on species.

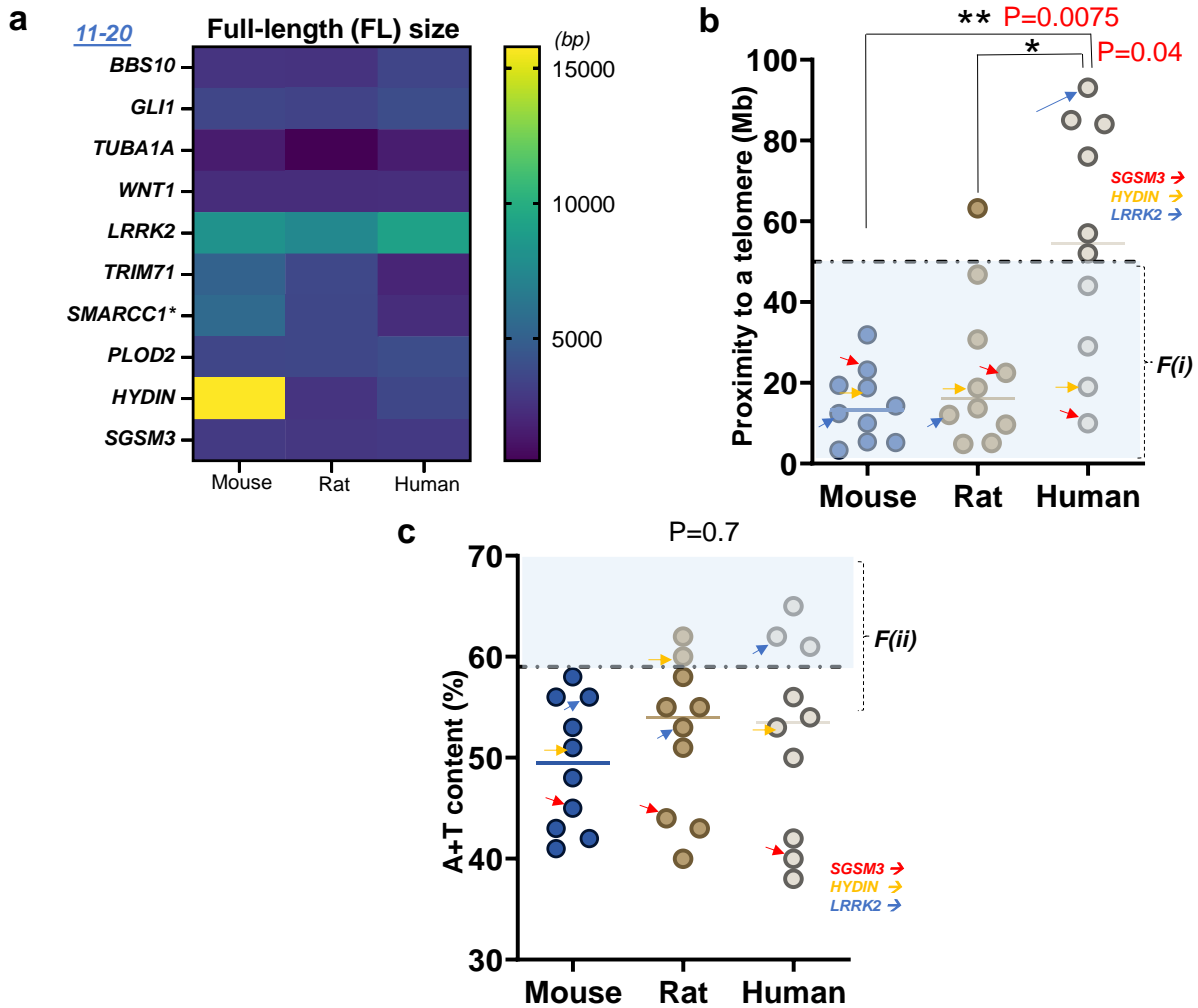

**Figure S4. Chromosomal characteristics of two factors in mice, rats, and humans.** (a) The full-length (FL) size of ten genes (a set of #11-20) over three species. Note that WNT1, PLOD2, and SGSM3 show consistent molecular sizes in three species while other genes slightly differ in humans as compared to rodents (b) Scatter plot summarizing ten genes (#11-20) causing CH with proximity to telomeres over mouse, rat, and human chromosomes. A horizontal dotted line indicates 50 Mb. F(i) and F(ii) indicate the first and second factor, respectively. Note that LRRK2 indicated by arrows in blue no longer satisfied F(i) in humans. \*,  $P < 0.05$ ; \*\*,  $P < 0.01$  by Kruskal-Wallis test. (c) Scatter plot showing A + T content of ten genes (#11-20) over three species demonstrates 2 (rat) or 3 (human) among 10 genes meeting the second factor, F(ii), associated with high mutation rate. Arrows in red, orange, and blue indicate SGSM3, HYDIN, and LRRK2, respectively (throughout b-c).

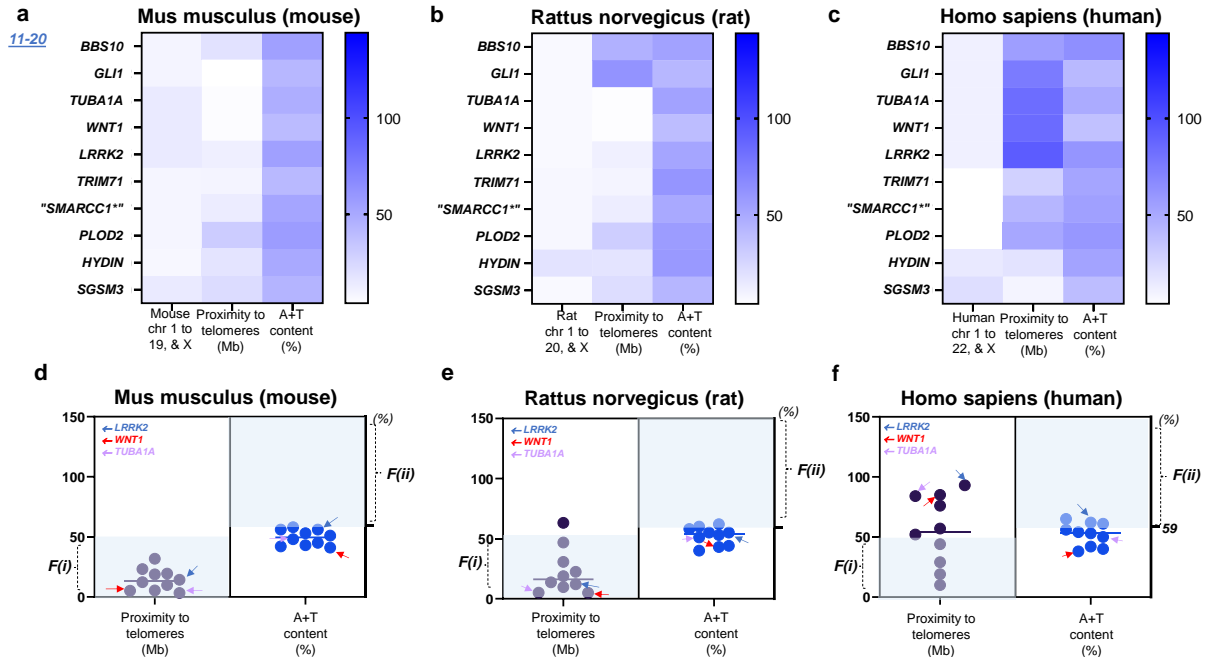

**Figure S5. Relative mutability of 10 human genes by two factors.** (a) The color-coded map showing chromosomal location, proximity to a telomere, and A+T content of *Mus musculus* (mouse) BBS10 and 9 other genes in chromosomes (chr 1 to 19 and X), proximity to telomeres (Mb), and A+T content (%). (b) the color-coded map showing chromosomal location, proximity to a telomere, and A+T content of *Rattus norvegicus* (rat) BBS10 and 9 other genes in chromosomes (chr 1 to 20 and X), proximity to telomeres (Mb), and A+T content (%). (c) the color-coded map showing chromosomal location, proximity to a telomere, and A+T content of *Homo sapiens* (human) BBS10 and 9 other genes in chromosomes (chr 1 to 22 and X), proximity to a telomere (Mb), and A+T content (%). (d) Scatter plots exhibiting relative mutability of ten mouse genes by proximity to telomeres (left) and A+T content (right). Shaded regions with light blue indicate genes satisfying either of the two factors. Genes outside the shaded regions at  $n = 0$  by F(i);  $n = 7$  by F(ii) are relatively less mutable. (e) Scatter plots displaying relative mutability of ten rat genes by proximity to a telomere (left) and A+T content (right). Shaded regions with light blue indicate genes satisfying either of the two factors. Genes outside the shaded regions at  $n = 1$  by F(i);  $n = 7$  by F(ii) are relatively less mutable. (f) Scatter plots indicating relative mutability of the same ten genes by proximity to a telomere (left) and A+T content (right) in human chromosomes. Shaded regions with light blue indicate human genes satisfying either of the two factors. Genes outside the shaded regions at  $n = 6$  by F(i);  $n = 7$  by F(ii) are relatively less mutable. Note that unlike mice and rats, only 5 of 10 human genes satisfied proximity to telomeres, F(i).

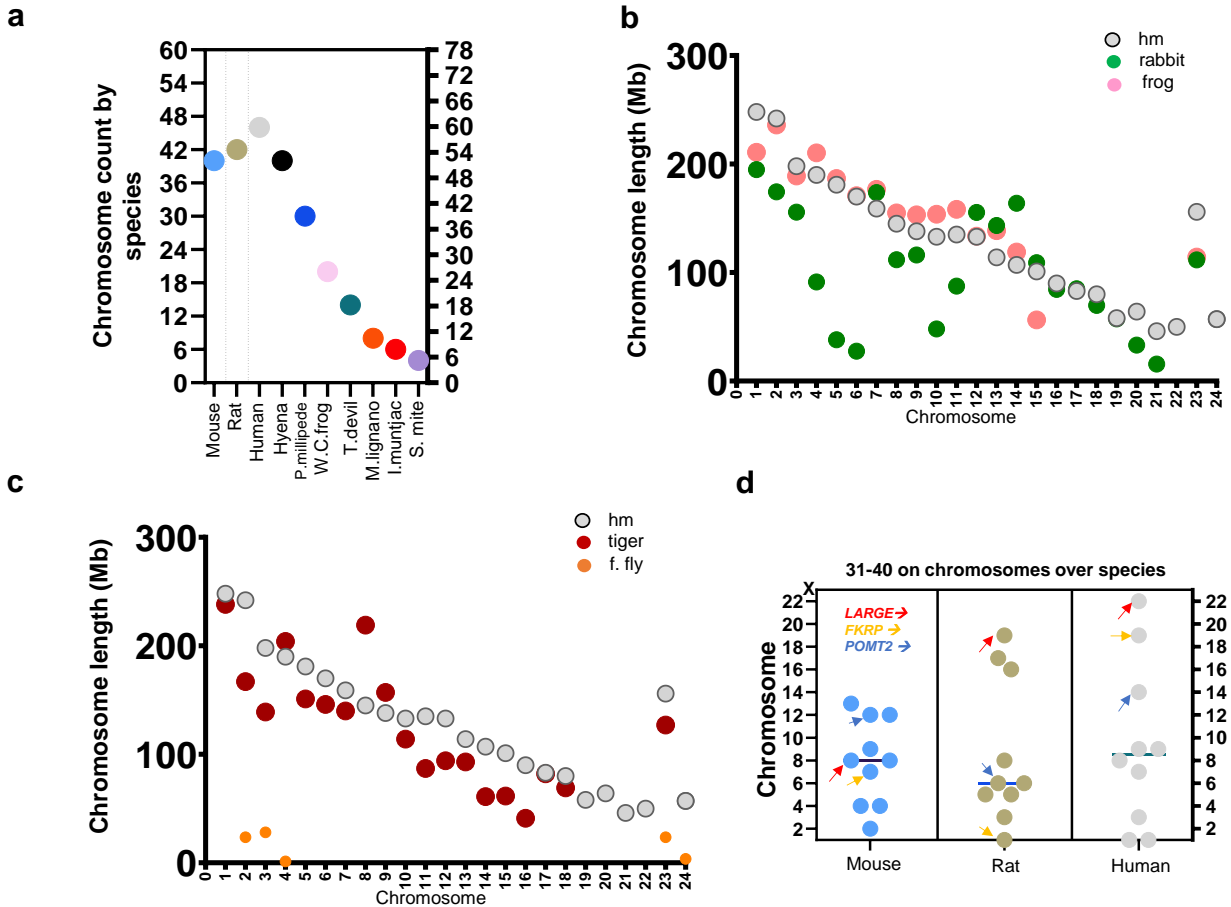

**Figure S6. Species differences in chromosomes and relative mutability of 10 other human genes associated with CH by two factors.** (a) Chromosome count of frequently used laboratory animals (mice & rats) and humans as compared to other species such as Hyena to Spider Mite (S. Mite). Pill millipede, P. millipede; Western clawed frog, W.C. frog; Tasmanian devil, T. devil; Indian muntjac, I. muntjac. Note that hyena have somewhat similar numbers to humans at 40 chromosomes (20 pairs) while S. Mites are fewer at 4. (b) Scatter plots showing chromosome length of three species with respect to each chromosome of humans (hm), rabbits, and (African clawed) frogs. Note that taller animals do not always show longer chromosomes. In chr 4, (African clawed) frogs, which are shorter in body size, have longer nucleotide sizes than humans and rabbits. x-axis is pairwise; humans showing 23 pairs from chr 1 to chr X (plotted at 23 of x-axis) or Y (plotted at 24 of x-axis); rabbits having 22 pairs; African clawed frogs showing 18 pairs. (c) Scatter plots showing chromosome length of three species with respect to each chromosome of humans (hm), tigers, and fruit flies. Note that taller animals do not always show longer chromosomes. In chr 4, tigers, which are shorter in body size, have longer nucleotide sizes than humans. x-axis is pairwise; humans showing 23 pairs from chr 1 to chr X (plotted at 23 of x-axis) or Y (plotted at 24 of x-axis); tigers having 19 pairs; fruit flies showing 4 pairs. (d) Chromosome number of ten (a set of #31-40) genes associated with CH over three species of mice, rats, and humans. Note that three genes of LARGE, FKRP, and POMT2 are located on different autosomes depending on species.

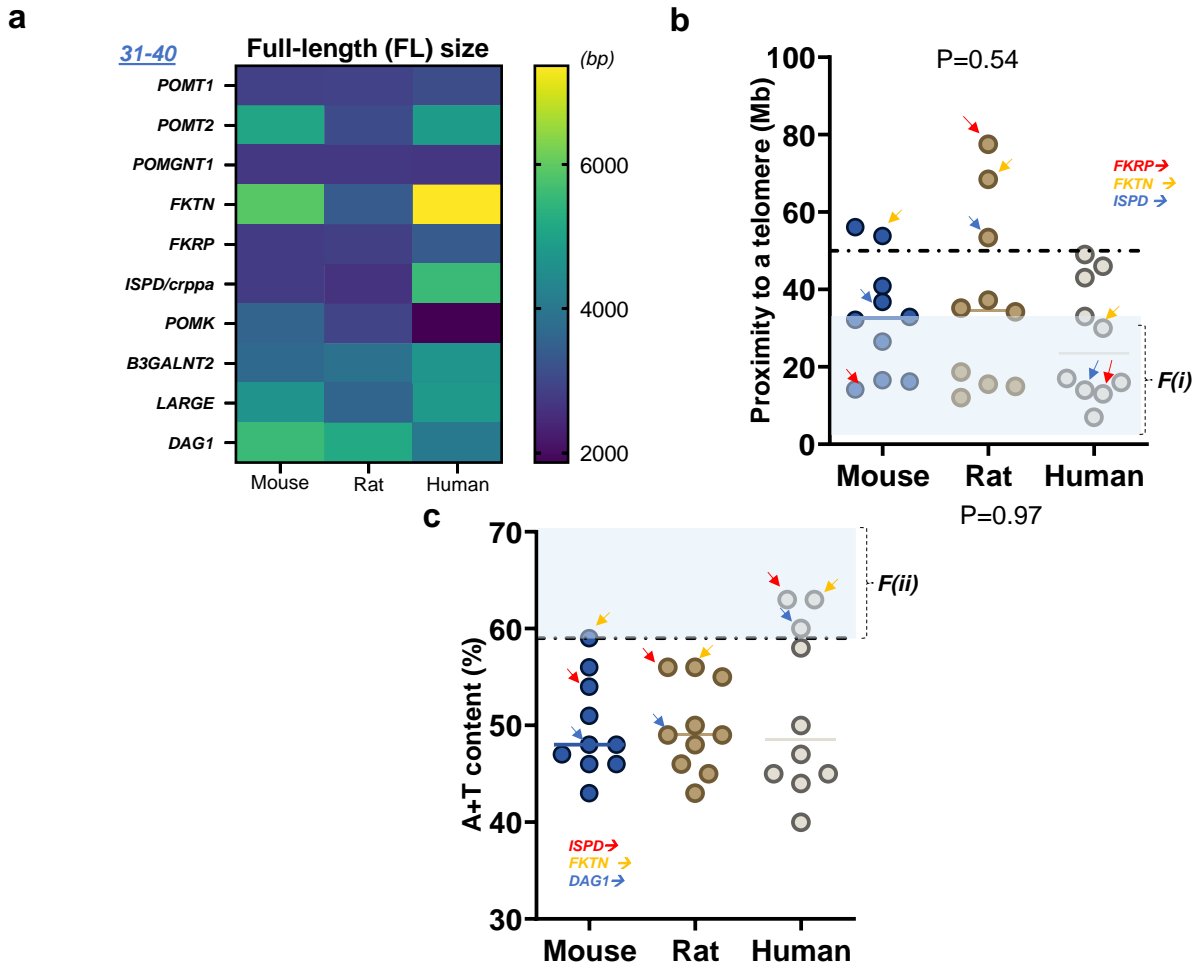

**Figure S7. Nucleotide size and two factors in rodent and human chromosomes.** (a) The nucleotide size of ten genes (a set of #31-40) associated with CH over three species. Note that POMT1, POMGNT1, and FKRP show consistent molecular sizes in three species while other genes slightly differ in humans as compared to rodents (b) Scatter plot demonstrating ten genes (#31-40) with proximity to telomeres over mouse, rat, and human chromosomes. A horizontal dotted line indicates 50 Mb. F(i) indicates the first factor or proximity to telomeres. Note that FKRP, FKTN, and ISPD indicated by arrows in red, yellow, and blue no longer satisfied F(i) in rats evolved in a more mutable way in humans, satisfying F(i) at <50 Mb. (c) Scatter plot showing A + T content of ten genes (#31-40) over three species displays 1 (mouse) or 3 (human) among 10 genes satisfying the second factor, F(ii), associated with high mutation rate. Arrows in red, orange, and blue indicate ISPD, FKTN, and DAG1, respectively. Statistical analysis by Kruskal-Wallis test (b-c).



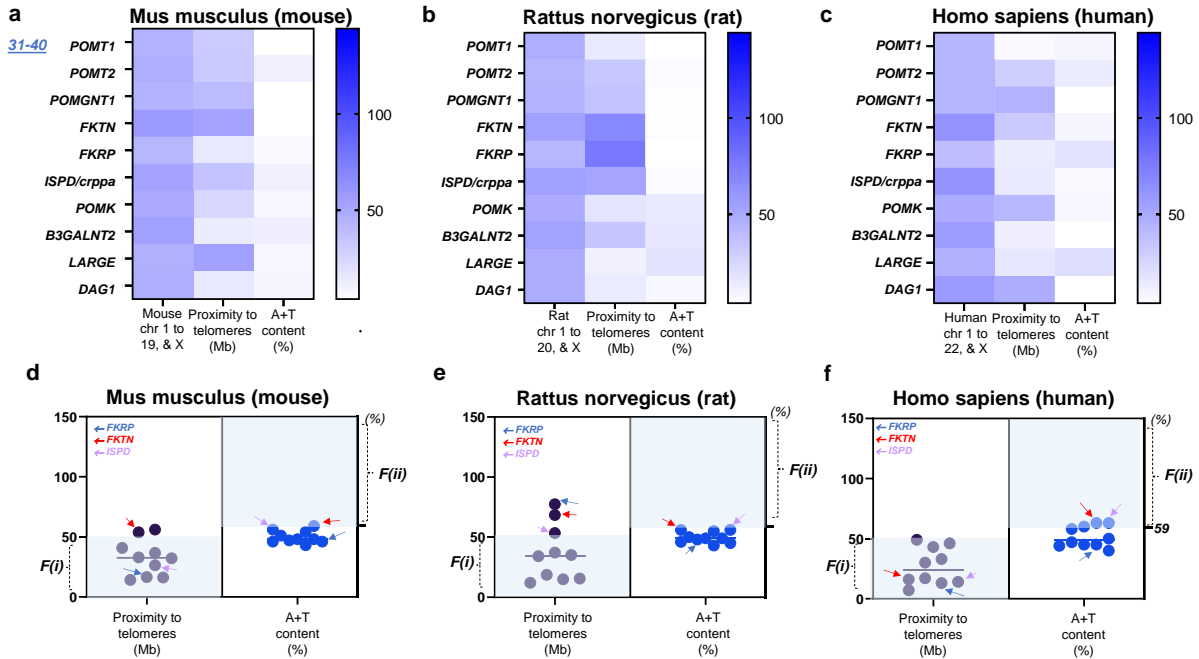

**Figure S8. Relative mutability of 10 genes by two factors over rodent and human chromosome.** (a) The color-coded map showing chromosomal location, proximity to a telomere, and A+T content of *Mus musculus* (mouse) POMT1 and 9 other genes in chromosomes (chr 1 to 19 and X), proximity to telomeres (Mb), and A+T content (%). (b) the color-coded map showing chromosomal location, proximity to a telomere, and A+T content of *Rattus norvegicus* (rat) POMT1 and 9 other genes in chromosomes (chr 1 to 20 and X), proximity to telomeres (Mb), and A+T content (%). (c) the color-coded map showing chromosomal location, proximity to a telomere, and A+T content of *Homo sapiens* (human) POMT1 and 9 other genes in chromosomes (chr 1 to 22 and X), proximity to a telomere (Mb), and A+T content (%). (d) Scatter plots summarizing relative mutability of ten mouse genes associated with CH by proximity to telomeres (left) and A+T content (right). Shaded regions with light blue indicate genes meeting either of the two factors. Genes outside the shaded regions at  $n = 2$  by F(i);  $n = 8$  by F(ii) are relatively less mutable. (e) Scatter plots showing relative mutability of ten rat genes associated with CH by proximity to a telomere (left) and A+T content (right). Shaded regions with light blue indicate genes meeting either of the two factors. Genes outside the shaded regions at  $n = 3$  by F(i);  $n = 7$  by F(ii) are relatively less mutable. (f) Scatter plots displaying relative mutability of the same ten genes by proximity to a telomere (left) and A+T content (right) in human chromosomes. Shaded regions with light blue indicate human genes satisfying either of the two factors. Genes outside the shaded regions at  $n = 1$  by F(i);  $n = 6$  by F(ii) are relatively less mutable. Note that unlike mice and rats, all (10 of 10) human genes satisfied proximity to telomeres, F(i).

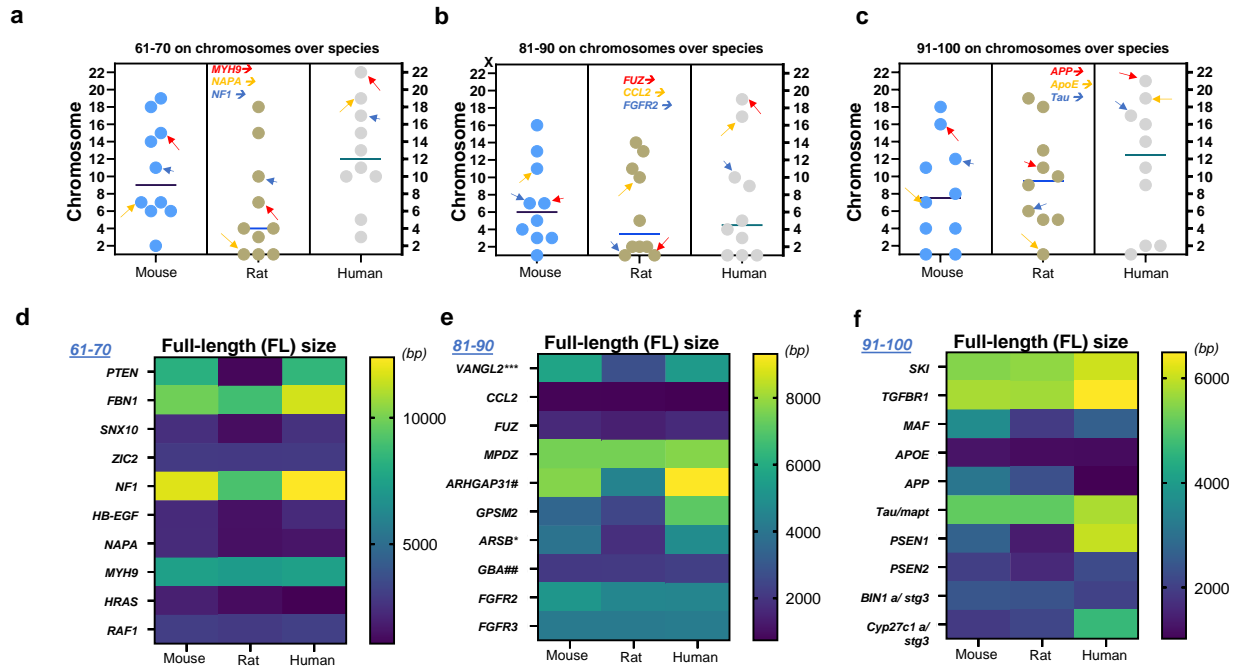

**Figure S9. Chromosome numbers and nucleotide sizes of thirty genes associated with CH over three species.** (a) Chromosome number of ten (a set of #61-70) genes associated with CH over three species of mice, rats, and humans. Note that three genes of MYH9, NAPA, and NF1 are located on different autosomes depending on species. (b) Chromosome number of ten (a set of #81-90) genes associated with CH over three species of mice, rats, and humans. Note that three genes of FUZ, CCL2, and FGFR2 are located on different autosomes depending on species. (c) Chromosome number of ten (a set of #91-100) genes associated with CH (#91-93) and/or Alzheimer's disease (#94-100) over three species of mice, rats, and humans. Note that three genes of APP, ApoE, and Tau are located on different autosomes depending on species. (d) The nucleotide size of ten genes (a set of #61-70) associated with CH over three species. Note that ZIC2, MYH9, HRAS, and RAF1 show consistent molecular sizes in three species while other genes slightly differ in humans as compared to rodents (e) The nucleotide size of ten genes (a set of #81-90) associated with CH over three species. Note that CCL2, MPDZ, GBA, and FGFR3 show consistent molecular sizes in three species while other genes slightly differ in humans as compared to rodents (f) The nucleotide size of ten genes (a set of #91-100) associated with CH and/or Alzheimer's disease over three species. Note that APOE show consistent molecular sizes in three species while other genes slightly differ in humans as compared to rodents

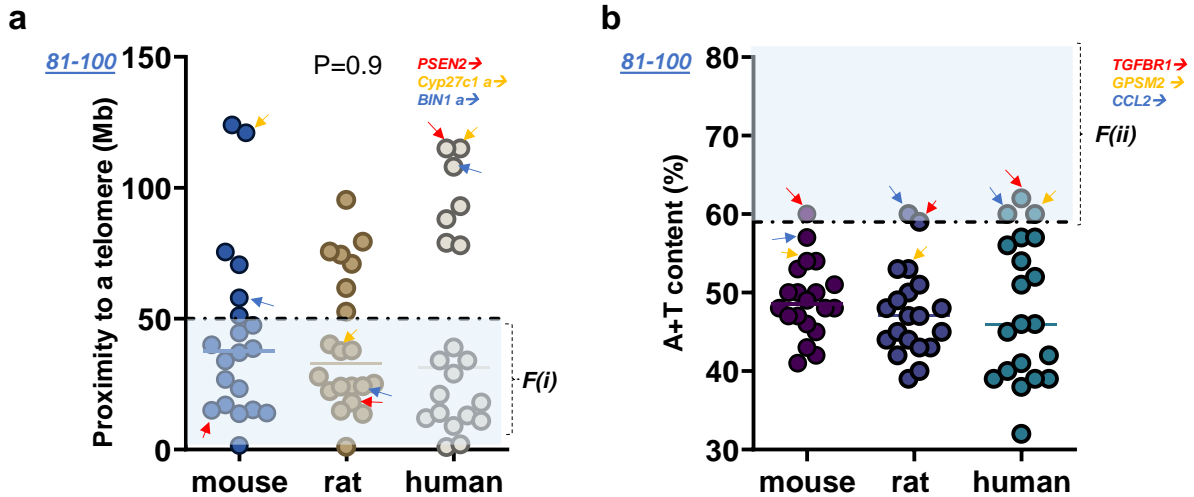

**Figure S10. Proximity to telomeres and A+T content of twenty genes associated with CH and/or Alzheimer's disease over three species.** (a) Scatter plot demonstrating twenty genes (#81-100) associated with CH and/or Alzheimer's disease with proximity to telomeres over mouse, rat, and human chromosomes. A horizontal dotted line indicates 50 Mb. *F(i)* indicates the first factor or proximity to telomeres. Note that *PSEN2*, *Cyp27c1a*, and *BIN1a* indicated by arrows in red, yellow, and blue no longer met *F(i)* in humans as compared to either mouse or rat chromosome. (b) Scatter plot displaying twenty genes (#81-100) associated with CH and/or Alzheimer's disease with A + T content over mouse, rat, and human chromosomes. A horizontal dotted line indicates 59%. *F(ii)* indicates the second factor or high A + T content at >59%. Note that *TGFBR1*, *GPSM2*, and *CCL2* indicated by arrows in red, yellow, and blue satisfied *F(ii)* in humans while the same no longer applies to mouse or rat chromosome

**Table S1a.** Two factor characteristics of mouse genes associated with fPD

| Mouse gene | gene ID        | chr* | gene locus | telomere locus | gene to tel. (Mb) | A, T ** (%) | A + T (%) | FL*** (bp) |
|------------|----------------|------|------------|----------------|-------------------|-------------|-----------|------------|
| 1          | PARK1 or PARK4 | 6    | 60         | 149            | 89                | 29,27       | 56        | 1208       |
| 2          | PARK2          | 17   | 11         | 95             | 84                | 26,24       | 50        | 3216       |
| 3          | PARK3          | NA   |            |                |                   |             |           |            |
| 4          | PARK5          | 5    | 66         | 151            | 85                | 21,23       | 44        | 1156       |
| 5          | PARK6          | 4    | 138        | 157            | 19                | 22,22       | 44        | 2774       |
| 6          | PARK7          | 4    | 150        | 157            | 7                 | 25,19       | 44        | 920        |
| 7          | PARK8          | 15   | 91         | 104            | 13                | 29,26       | 55        | 8231       |
| 8          | PARK9          | 4    | 140        | 157            | 17                | 18,19       | 37        | 3908       |
| 9          | PARK10         | 4    | 106        | 157            | 51                | 27,26       | 53        | 10601      |
| 10         | PARK11         | 1    | 87         | 195            | 108               | 29,22       | 51        | 5743       |
| 11         | PARK13         | 6    | 83         | 150            | 67                | 21,22       | 43        | 1739       |
| 12         | PARK14         | 15   | 79         | 104            | 25                | 22,19       | 41        | 3106       |
| 13         | PARK15         | 10   | 85         | 131            | 46                | 23,25       | 48        | 1886       |
| 14         | PARK17         | 8    | 85         | 130            | 45                | 30,29       | 60        | 3196       |
| 15         | PARK18         | 16   | 20         | 98             | 78                | 26,20       | 46        | 5358       |
| 16         | GBA            | 3    | 89         | 160            | 71                | 23,24       | 47        | 5906       |
| 17         | NR4A2          | 2    | 56         | 182            | 126               | 26,24       | 50        | 3172       |

**Table S1b.** Two factor characteristics of rat genes associated with fPD

| Rat gene | gene ID        | chr* | gene locus | telomere locus | gene to tel. (Mb) | A, T ** (%) | A + T (%) | FL*** (bp) |
|----------|----------------|------|------------|----------------|-------------------|-------------|-----------|------------|
| 1        | PARK1 or PARK4 | 4    | 89.74      | 182.687        | 92.947            | 28,27       | 55        | 1150       |
| 2        | PARK2          | 1    | 48.8       | 260.522        | 211.722           | 24,20       | 44        | 1564       |
| 3        | PARK3          | NA   |            |                |                   |             |           |            |
| 4        | PARK5          | 14   | 41         | 104            | 63                | 22,23       | 45.1      | 1029       |
| 5        | PARK6          | 5    | 150        | 156            | 6                 | 22,18       | 40        | 1146       |
| 6        | PARK7          | 5    | 161        | 166            | 5                 | 26,21       | 47        | 1054       |
| 7        | PARK8          | 7    | 122        | 135            | 13                | 28,25       | 53        | 8084       |
| 8        | PARK9          | 5    | 153        | 166            | 13                | 21,19       | 40        | 3905       |
| 9        | PARK10         | 5    | 121        | 166            | 45                | 27,26       | 53        | 10593      |
| 10       | PARK11         | 9    | 88         | 114            | 26                | 29,21       | 50        | 5900       |
| 11       | PARK13         | 4    | 115        | 183            | 68                | 21,23       | 44        | 1607       |
| 12       | PARK14         | 7    | 110        | 135            | 25                | 23,20       | 43        | 3100       |
| 13       | PARK15         | 7    | 17         | 135            | 118               | 25,23       | 48        | 1819       |
| 14       | PARK17         | 19   | 21         | 54             | 33                | 30,29       | 60        | 3196       |
| 15       | PARK18         | 11   | 80         | 85             | 5                 | 25,20       | 45        | 5421       |
| 16       | GBA            | 2    | 174        | 249            | 75                | 25,24       | 49        | 2605       |
| 17       | NR4A2          | 3    | 41         | 169            | 128               | 27,25       | 52        | 2582       |

**Table S1c.** Two factor characteristics of human genes associated with fPD

| Human gene | gene ID        | chr* | gene locus | telomere locus | gene to tel. (Mb) | A, T ** (%) | A + T (%) | FL*** (bp) |
|------------|----------------|------|------------|----------------|-------------------|-------------|-----------|------------|
| 1          | PARK1 or PARK4 | 4    | q22.1      | q35.1          | 100               | 27,30       | 57        | 7111       |
| 2          | PARK2          | 6    | q26        | q27            | 9                 | 27,26       | 53        | 4178       |
| 3          | PARK3          | 2    | p13        | p25.3          | 72                | 20,22       | 42        | 1432       |
| 4          | PARK5          | 2    | p13.3      | p25.3          | 72                | 20,22       | 42        | 1432       |
| 5          | PARK6          | 1    | p36.12     | p36.32         | 20                | 20,23       | 43        | 2657       |
| 6          | PARK7          | 1    | p36.32     | p36.32         | 7                 | 27,28       | 55        | 1127       |
| 7          | PARK8          | 12   | q12        | q24.32         | 93                | 31,31       | 62        | 9239       |
| 8          | PARK9          | 1    | p36.21     | p36.32         | 16                | 17,20       | 37        | 3996       |
| 9          | PARK10         | 1    | p32.2      | p36.32         | 55                | 28,29       | 57        | 10800      |
| 10         | PARK11         | 2    | q37.1      | q37.3          | 10                | 28,27       | 55        | 7928       |
| 11         | PARK13         | 2    | p12        | p25.3          | 74                | 20,23       | 43        | 1785       |
| 12         | PARK14         | 22   | q13.1      | q13.32         | 12                | 20,20       | 40        | 3299       |
| 13         | PARK15         | 22   | q12.3      | q13.32         | 18                | 23,28       | 51        | 2060       |
| 14         | PARK17         | 16   | q12.1      | q24.2          | 44                | 28,31       | 59        | 6776       |
| 15         | PARK18         | 3    | q26.32     | q29            | 14                | 24,21       | 45        | 5078       |
| 16         | GBA            | 1    | q21.3      | q44            | 92                | 22,24       | 46        | 2291       |
| 17         | NR4A2          | 2    | q24.1      | q37.3          | 84                | 26,27       | 53        | 3475       |

**Table S2a.** Relative mutability of ten human genes (#1-10) associated with CH

| Human gene | gene ID     | chr* | gene locus | telomere locus | gene to tel. (Mb) | A, T ** (%) | A + T (%) | FL*** (bp) |
|------------|-------------|------|------------|----------------|-------------------|-------------|-----------|------------|
| 1          | L1CAM       | X    | q28        | q28            | 3                 | 21,20       | 41        | 5099       |
| 2          | ZCCHC8      | 12   | q24.31     | q24.32         | 11                | 30,28       | 58        | 4113       |
| 3          | Orai1       | 12   | q24.31     | q24.32         | 12                | 16,19       | 35        | 1496       |
| 4          | MYC         | 8    | q24.13     | q24.3          | 18                | 26,26       | 52        | 3721       |
| 5          | TMEM116     | 12   | q24.13     | q24.32         | 22                | 25,30       | 55        | 1543       |
| 6          | TRPV4       | 12   | q24.11     | q24.32         | 24                | 18,23       | 41        | 3228       |
| 7          | IGF1        | 12   | q23.1      | q24.32         | 31                | 31,33       | 64        | 7277       |
| 8          | DCN         | 12   | q21.33     | q24.32         | 42                | 30,33       | 63        | 6850       |
| 9          | MKS4/cep290 | 12   | q21.33     | q24.32         | 45                | 41,25       | 66        | 7824       |
| 10         | TMEM67/MKS3 | 8    | q22.2      | q24.3          | 51                | 30,34       | 64        | 4678       |

**Table S2b.** Relative mutability of ten rat genes (#1-10) associated with CH

| Rat gene | gene ID     | chr* | gene locus | telomere locus | gene to tel. (Mb) | A, T ** (%) | A + T (%) | FL*** (bp) |
|----------|-------------|------|------------|----------------|-------------------|-------------|-----------|------------|
| 1        | L1CAM       | X    | 151623     | 152,453        | 1                 | 25,24       | 49        | 5079       |
| 2        | ZCCHC8      | 12   | 32892      | 46669          | 13.777            | 27,25       | 52        | 2818       |
| 3        | Orai1       | 12   | 33548      | 46669          | 13.121            | 20,17       | 37        | 1184       |
| 4        | MYC         | 7    | 93598      | 135012         | 41.414            | 25,24       | 49        | 2355       |
| 5        | TMEM116     | 12   | 35089      | 46669          | 11.58             | 23,26       | 49        | 1357       |
| 6        | TRPV4       | 12   | 41997      | 46669          | 4.672             | 20,23       | 43        | 3211       |
| 7        | IGF1        | 7    | 22361      | 0              | 22.361            | 30,30       | 60        | 1530       |
| 8        | DCN         | 7    | 32321      | 0              | 32.321            | 33,27       | 60        | 1639       |
| 9        | MKS4/cep290 | 7    | 35399      | 0              | 35.399            | 39,23       | 62        | 8232       |
| 10       | TMEM67/MKS3 | 5    | 25589      | 0              | 25.589            | 26,32       | 58        | 4035       |

**Table S2c.** Relative mutability of ten mouse genes (#1-10) associated with CH

| Mouse gene | gene ID     | chr* | gene locus | telomere locus | gene to tel. (Mb) | A, T ** (%) | A + T (%) | FL*** (bp) |
|------------|-------------|------|------------|----------------|-------------------|-------------|-----------|------------|
| 1          | L1CAM       | X    | 72924      | 0              | 72.924            | 25,22       | 47        | 5288       |
| 2          | ZCCHC8      | 5    | 123859     | 151758         | 27.899            | 26,27       | 53        | 4286       |
| 3          | Orai1       | 5    | 123168     | 151758         | 28.59             | 19,23       | 42        | 1871       |
| 4          | MYC         | 15   | 61862      | 104073         | 42.211            | 24,23       | 47        | 2399       |
| 5          | TMEM116     | 5    | 121656     | 151758         | 30.102            | 21,28       | 49        | 1297       |
| 6          | TRPV4       | 5    | 114796     | 151758         | 36.962            | 20,22       | 42        | 3247       |
| 7          | IGF1        | 10   | 87772      | 130530         | 42.758            | 30,33       | 63        | 7125       |
| 8          | DCN         | 10   | 97354      | 130530         | 33.176            | 32,27       | 59        | 1829       |
| 9          | MKS4/cep290 | 10   | 100411     | 130530         | 30.119            | 39,23       | 62        | 8188       |
| 10         | TMEM67/MKS3 | 4    | 12090      | 0              | 12.09             | 27,31       | 58        | 3452       |

**Table S3a.** Relative mutability of ten human genes (#11-20) associated with CH

| Human gene | gene ID  | chr* | gene locus | telomere locus | gene to tel. (Mb) | A, T ** (%) | A + T (%) | FL*** (bp) |
|------------|----------|------|------------|----------------|-------------------|-------------|-----------|------------|
| 11         | BBS10    | 12   | q21.1      | q24.32         | 57                | 30,35       | 65        | 3568       |
| 12         | GLI1     | 12   | q13.2      | q24.32         | 76                | 21,21       | 42        | 3972       |
| 13         | TUBA1A   | 12   | q13.11     | q24.32         | 84                | 23,27       | 50        | 1672       |
| 14         | WNT1     | 12   | q13.11     | q24.32         | 85                | 17,21       | 38        | 2422       |
| 15         | LRRK2    | 12   | q12        | q24.32         | 93                | 31,31       | 62        | 9239       |
| 16         | TRIM71   | 3    | P22.5      | P26.1          | 29                | 24 29       | 53%       | 2002       |
| 17         | SMARCC1* | 3    | P23.5      | P26.1          | 44                | 25 31       | 56%       | 2344       |
| 18         | PLOD2    | 3    | Q23.5      | Q29            | 52                | 30 31       | 61%       | 4009       |
| 19         | HYDIN    | 16   | Q22.2      | Q24.2          | 19                | 27 27       | 54%       | 3720       |
| 20         | SGSM3    | 22   | Q13.1      | Q13.31         | 10                | 19 21       | 40%       | 2986       |

**Table S3b.** Relative mutability of ten rat genes (#11-20) associated with CH

| Rat gene | gene ID  | chr* | gene locus | telomere locus | gene to tel. (Mb) | A, T ** (%) | A + T (%) | FL*** (bp) |
|----------|----------|------|------------|----------------|-------------------|-------------|-----------|------------|
| 11       | BBS10    | 7    | 46754      | 0              | 46.754            | 26,29       | 55        | 2667       |
| 12       | GLI1     | 7    | 63169      | 0              | 63.169            | 22,21       | 43        | 3501       |
| 13       | TUBA1A   | 7    | 130116     | 135012         | 4.896             | 23,32       | 55        | 482        |
| 14       | WNT1     | 7    | 129942     | 135012         | 5.07              | 18,22       | 40        | 2360       |
| 15       | LRRK2    | 7    | 122987     | 135012         | 12.025            | 27,26       | 53        | 7581       |
| 16       | TRIM71   | 8    | 114250     | 123900         | 9.65              | 35,27       | 62        | 3769       |
| 17       | SMARCC1* | 8    | 110214     | 123900         | 13.686            | 29,22       | 51        | 3670       |
| 18       | PLOD2    | 8    | 93167      | 123900         | 30.733            | 28,30       | 58        | 3672       |
| 19       | HYDIN    | 19   | 38583      | 57337          | 18.754            | 34,26       | 60        | 2756       |
| 20       | SGSM3    | 7    | 112544     | 135012         | 22.468            | 22,22       | 44        | 2854       |

**Table S3c.** Relative mutability of ten mouse genes (#11-20) associated with CH

| Mouse gene | gene ID  | chr* | gene locus | telomere locus | gene to tel. (Mb) | A, T ** (%) | A + T (%) | FL*** (bp) |
|------------|----------|------|------------|----------------|-------------------|-------------|-----------|------------|
| 11         | BBS10    | 10   | 111137     | 130530         | 19.393            | 27,29       | 56        | 2753       |
| 12         | GLI1     | 10   | 127177     | 130530         | 3.353             | 21,22       | 43        | 3662       |
| 13         | TUBA1A   | 15   | 98851      | 104073         | 5.222             | 22,26       | 48        | 1591       |
| 14         | WNT1     | 15   | 98691      | 104073         | 5.382             | 17,24       | 41        | 2371       |
| 15         | LRRK2    | 15   | 91700      | 104073         | 12.373            | 28,28       | 56        | 8231       |
| 16         | TRIM71   | 9    | 114393     | 124359         | 9.966             | 19,23       | 42        | 5197       |
| 17         | SMARCC1* | 9    | 110069     | 124359         | 14.29             | 27,26       | 53        | 5684       |
| 18         | PLOD2    | 9    | 92490      | 124359         | 31.869            | 28,30       | 58        | 3656       |
| 19         | HYDIN    | 8    | 111336     | 130127         | 18.791            | 27,24       | 51        | 15783      |
| 20         | SGSM3    | 15   | 80896      | 104073         | 23.177            | 22,23       | 45        | 3013       |



**Table S4a.** Relative mutability of ten human genes (#21-30) associated with CH

| Human gene | gene ID   | chr* | gene locus | telomere locus | gene to tel. (Mb) | A, T ** (%) | A + T (%) | FL*** (bp) |
|------------|-----------|------|------------|----------------|-------------------|-------------|-----------|------------|
| 21         | EN1 **    | 2    | Q14.2      | Q36.3          | 124               | 20 21       | 41%       | 2427       |
| 22         | RFX4      | 12   | Q23.3      | Q24.22         | 27                | 27 28       | 53%       | 3345       |
| 23         | MSX1      | 4    | P16.2      | P16.3          | 3                 | 22 20       | 42%       | 1940       |
| 24         | PAX6      | 11   | P13        | P15.5          | 30                | 31 25       | 56%       | 2500       |
| 25         | RFX3      | 9    | P24.2      | P24.2          | 0.5               | 30 30       | 60%       | 6274       |
| 26         | PAC1/klf6 | 10   | P15.3      | P15.3          | 0.2               | 26 29       | 55%       | 4590       |
| 27         | SOCS1     | 16   | P13.13     | P13.3          | 10                | 14 21       | 35%       | 1216       |
| 28         | FOXJ1     | 17   | Q25.2      | Q25.3          | 7                 | 19 16       | 35%       | 2587       |
| 29         | AP1S2     | 23   | P22.2      | P22.3          | 15                | 30 34       | 64%       | 2119       |
| 30         | CCDC88C   | 14   | Q32.11     | Q32.33         | 16                | 24 18       | 42%       | 7519       |

**Table S4b.** Relative mutability of ten rat genes (#21-30) associated with CH

| Rat gene | gene ID   | chr* | gene locus | telomere locus | gene to tel. (Mb) | A, T ** (%) | A + T (%) | FL*** (bp) |
|----------|-----------|------|------------|----------------|-------------------|-------------|-----------|------------|
| 21       | EN1 **    | 13   | 31756      | 0              | 31.756            | 22,21       | 43        | 2678       |
| 22       | RFX4      | 7    | 19015      | 0              | 19.015            | 25,22       | 47        | 2052       |
| 23       | MSX1      | 14   | 72964      | 104886         | 31.922            | 21,21       | 42        | 1894       |
| 24       | PAX6      | 3    | 92157      | 169034         | 76.877            | 30,24       | 54        | 2191       |
| 25       | RFX3      | 1    | 225709     | 260522         | 34.813            | 29,24       | 53        | 2441       |
| 26       | PAC1/klf6 | 17   | 64548      | 86533          | 21.985            | 27,31       | 58        | 4206       |
| 27       | SOCS1     | 10   | 4884       | 0              | 4.884             | 15,22       | 37        | 1190       |
| 28       | FOXJ1     | 10   | 101570     | 107211         | 5.641             | 21,18       | 39        | 2427       |
| 29       | AP1S2     | 23   | 30598      | 0              | 30.598            | 31,31       | 62        | 1838       |
| 30       | CCDC88C   | 6    | 120289     | 140994         | 20.705            | 25,19       | 44        | 7575       |

**Table S4c.** Relative mutability of ten mouse genes (#21-30) associated with CH

| Mouse gene | gene ID   | chr* | gene locus | telomere locus | gene to tel. (Mb) | A, T ** (%) | A + T (%) | FL*** (bp) |
|------------|-----------|------|------------|----------------|-------------------|-------------|-----------|------------|
| 21         | EN1 **    | 1    | 120535     | 195154         | 74.619            | 21,23       | 44        | 2523       |
| 22         | RFX4      | 10   | 84742      | 130530         | 45.788            | 26,28       | 54        | 3274       |
| 23         | MSX1      | 5    | 37981      | 0              | 37.981            | 21,21       | 42        | 1931       |
| 24         | PAX6      | 2    | 105528     | 181755         | 76.227            | 27,26       | 53        | 4207       |
| 25         | RFX3      | 19   | 27995      | 0              | 27.995            | 28,32       | 60        | 9187       |
| 26         | PAC1/klf6 | 13   | 5920       | 0              | 5.92              | 28,30       | 58        | 4217       |
| 27         | SOCS1     | 16   | 10603      | 0              | 10.603            | 15,23       | 38        | 1220       |
| 28         | FOXJ1     | 11   | 116226     | 121973         | 5.747             | 22,18       | 40        | 2599       |
| 29         | AP1S2     | 23   | 162716     | 169476         | 6.76              | 30,34       | 64        | 3327       |
| 30         | CCDC88C   | 12   | 100995     | 120092         | 19.097            | 26,19       | 45        | 7377       |

**Table S5a.** Relative mutability of ten human genes (#31-40) associated with CH

| Human gene | gene ID    | chr* | gene locus | telomere locus | gene to tel. (Mb) | A, T ** (%) | A + T (%) | FL*** (bp) |
|------------|------------|------|------------|----------------|-------------------|-------------|-----------|------------|
| 31         | POMT1      | 9    | Q34.12     | Q34.3          | 7                 | 20 24       | 44%       | 3123       |
| 32         | POMT2      | 14   | Q24.3      | Q31.1          | 30                | 20 25       | 45%       | 4875       |
| 33         | POMGNT1    | 1    | P34.1      | P36.33         | 46                | 22 23       | 45%       | 2719       |
| 34         | FKTN       | 9    | Q31.2      | Q34.3          | 33                | 30 33       | 63%       | 7364       |
| 35         | FKRP       | 19   | Q13.32     | Q13.43         | 14                | 18 22       | 40%       | 3411       |
| 36         | ISPD/crppa | 7    | P21.2      | P22.3          | 16                | 30 33       | 63%       | 5592       |
| 37         | POMK       | 8    | P11.21     | P23.3          | 43                | 23 27       | 50%       | 1868       |
| 38         | B3GALNT2   | 1    | P42.2      | Q44            | 13                | 27 31       | 58%       | 4719       |
| 39         | LARGE      | 22   | Q12.3      | Q13.33         | 17                | 23 24       | 47%       | 4816       |
| 40         | DAG1       | 3    | P21.31     | P26.3          | 49                | 31 29       | 60%       | 4074       |

**Table S5b.** Relative mutability of ten rat genes (#31-40) associated with CH

| Rat gene | gene ID    | chr* | gene locus | telomere locus | gene to tel. (Mb) | A, T ** (%) | A + T (%) | FL*** (bp) |
|----------|------------|------|------------|----------------|-------------------|-------------|-----------|------------|
| 31       | POMT1      | 3    | 15538      | 0              | 15.538            | 22,26       | 48        | 2929       |
| 32       | POMT2      | 6    | 106794     | 140994         | 34.2              | 21,24       | 45        | 3097       |
| 33       | POMGNT1    | 5    | 129644     | 166875         | 37.231            | 23,23       | 46        | 2745       |
| 34       | FKTN       | 5    | 68396      | 0              | 68.396            | 28,28       | 56        | 3402       |
| 35       | FKRP       | 1    | 77486      | 0              | 77.486            | 20,23       | 43        | 2860       |
| 36       | ISPD/crppa | 6    | 53397      | 0              | 53.397            | 27,29       | 56        | 2645       |
| 37       | POMK       | 16   | 66101      | 84729          | 18.628            | 25,25       | 50        | 2967       |
| 38       | B3GALNT2   | 17   | 51377      | 86533          | 35.156            | 27,28       | 55        | 3936       |
| 39       | LARGE      | 19   | 12048      | 0              | 12.048            | 24,25       | 49        | 3634       |
| 40       | DAG1       | 8    | 108955     | 123900         | 14.945            | 23,26       | 49        | 5169       |

**Table S5c.** Relative mutability of ten mouse genes (#31-40) associated with CH

| Mouse gene | gene ID    | chr* | gene locus | telomere locus | gene to tel. (Mb) | A, T ** (%) | A + T (%) | FL*** (bp) |
|------------|------------|------|------------|----------------|-------------------|-------------|-----------|------------|
| 31         | POMT1      | 2    | 32145      | 0              | 32.145            | 22,24       | 46        | 2884       |
| 32         | POMT2      | 12   | 87194      | 120092         | 32.898            | 21,27       | 48        | 5082       |
| 33         | POMGNT1    | 4    | 116017     | 156860         | 40.843            | 23,23       | 46        | 2736       |
| 34         | FKTN       | 4    | 53765      | 0              | 53.765            | 28,31       | 59        | 5924       |
| 35         | FKRP       | 7    | 16550      | 0              | 16.55             | 19,24       | 43        | 2817       |
| 36         | ISPD/crppa | 12   | 36739      | 0              | 36.739            | 26,28       | 54        | 2818       |
| 37         | POMK       | 8    | 26484      | 0              | 26.484            | 24,27       | 51        | 3601       |
| 38         | B3GALNT2   | 13   | 14173      | 0              | 14.173            | 27,29       | 56        | 3716       |
| 39         | LARGE      | 8    | 74080      | 130127         | 56.047            | 23,24       | 47        | 4671       |
| 40         | DAG1       | 9    | 108141     | 124359         | 16.218            | 22,26       | 48        | 5591       |

**Table S6a.** Relative mutability of ten human genes (#41-50) associated with CH

| Human gene | gene ID  | chr* | gene locus | telomere locus | gene to tel. (Mb) | A, T ** (%) | A + T (%) | FL*** (bp) |
|------------|----------|------|------------|----------------|-------------------|-------------|-----------|------------|
| 41         | TBX1     | 22   | Q11.21     | Q13.33         | 31                | 20 16       | 36%       | 1538       |
| 42         | B3GNT1*  | 11   | Q13.2      | Q25            | 69                | 20 24       | 44%       | 2007       |
| 43         | B3GALTL  | 13   | Q12.3      | Q34            | 83                | 28 32       | 60%       | 4215       |
| 44         | LAMB1    | 7    | Q22.3      | Q36.3          | 49                | 27 25       | 52%       | 5650       |
| 45         | ALG13    | X    | Q23        | Q28            | 45                | 32 35       | 67%       | 2718       |
| 46         | DNAH5    | 5    | P15.2      | P15.33         | 13                | 30 27       | 57%       | 15781      |
| 47         | DYX1C1   | 15   | Q21.3      | Q26.3          | 46                | 34 27       | 61%       | 1993       |
| 48         | CENPF    | 1    | Q41        | Q44            | 34                | 36 24       | 60%       | 10290      |
| 49         | IFT172   | 2    | P23.2      | P25.3          | 27                | 26 24       | 50%       | 5395       |
| 50         | KIAA0586 | 14   | Q23.1      | Q32.33         | 49                | 30 31       | 61%       | 8330       |

**Table S6b.** Relative mutability of ten rat genes (#41-50) associated with CH

| Rat gene | gene ID  | chr* | gene locus | telomere locus | gene to tel. (Mb) | A, T ** (%) | A + T (%) | FL*** (bp) |
|----------|----------|------|------------|----------------|-------------------|-------------|-----------|------------|
| 41       | TBX1     | 11   | 82419      | 86241          | 3.822             | 18,16       | 34        | 1855       |
| 42       | B3GNT1*  | 1    | 202345     | 260522         | 58.177            | 22,25       | 47        | 1980       |
| 43       | B3GALTL  | 12   | 5346       | 0              | 5.346             | 26,28       | 54        | 4429       |
| 44       | LAMB1    | 6    | 47902      | 0              | 47.902            | 25,24       | 49        | 5822       |
| 45       | ALG13    | X    | 107906     | 152453         | 44.547            | 33,30       | 63        | 1625       |
| 46       | DNAH5    | 2    | 79255      | 0              | 79.255            | 28,27       | 55        | 15796      |
| 47       | DYX1C1   | 8    | 73711      | 123900         | 50.189            | 31,25       | 56        | 2012       |
| 48       | CENPF    | 13   | 101229     | 106807         | 5.578             | 35,23       | 58        | 10069      |
| 49       | IFT172   | 6    | 25121      | 0              | 25.121            | 25,22       | 47        | 5382       |
| 50       | KIAA0586 | 6    | 89725      | 140994         | 51.269            | 31,24       | 55        | 4983       |

**Table S6c.** Relative mutability of ten mouse genes (#41-50) associated with CH

| Mouse gene | gene ID  | chr* | gene locus | telomere locus | gene to tel. (Mb) | A, T ** (%) | A + T (%) | FL*** (bp) |
|------------|----------|------|------------|----------------|-------------------|-------------|-----------|------------|
| 41         | TBX1     | 16   | 18409      | 0              | 18.409            | 17,19       | 36        | 1786       |
| 42         | B3GNT1*  | 11   | 22810      | 0              | 22.81             | 26,29       | 55        | 2699       |
| 43         | B3GALTL  | 5    | 149686     | 151758         | 2.072             | 27,29       | 56        | 4570       |
| 44         | LAMB1    | 12   | 31379      | 0              | 31.379            | 25,24       | 49        | 5784       |
| 45         | ALG13    | X    | 143157     | 169476         | 26.319            | 32,31       | 63        | 1640       |
| 46         | DNAH5    | 15   | 28472      | 0              | 28.472            | 28,26       | 54        | 15616      |
| 47         | DYX1C1   | 9    | 72880      | 124359         | 51.479            | 32,24       | 56        | 1978       |
| 48         | CENPF    | 1    | 189420     | 195154         | 5.734             | 34,24       | 58        | 11130      |
| 49         | IFT172   | 5    | 31448      | 0              | 31.448            | 25,23       | 48        | 5440       |
| 50         | KIAA0586 | 6    | 71852      | 0              | 71.852            | 29,23       | 52        | 2777       |

**Table S7a.** Relative mutability of ten human genes (#51-60) associated with CH

| Human gene | gene ID   | chr* | gene locus | telomere locus | gene to tel. (Mb) | A, T ** (%) | A + T (%) | FL*** (bp) |
|------------|-----------|------|------------|----------------|-------------------|-------------|-----------|------------|
| 51         | MKS1      | 17   | Q22        | Q25.3          | 24                | 22 25       | 46%       | 2343       |
| 52         | TMEM216** | 11   | Q12.1      | Q25            | 74                | 20 28       | 48%       | 1287       |
| 53         | CC2D2A    | 4    | P15.32     | P16.3          | 15                | 31 24       | 56%       | 1682       |
| 54         | CRB2      | 9    | Q33.3      | Q34.3          | 15                | 14 22       | 36%       | 5613       |
| 55         | HYLS1     | 11   | Q24.1      | Q25            | 10                | 32 26       | 58%       | 1829       |
| 56         | KIF7      | 15   | Q26.1      | Q26.3          | 12                | 20 17       | 37%       | 4567       |
| 57         | GLI3      | 7    | P14.1      | P22.3          | 42                | 24 26       | 50%       | 8405       |
| 58         | CEP83     | 12   | Q22        | Q24.33         | 39                | 36 26       | 62%       | 3686       |
| 59         | OFD1      | X    | P22.2      | P22.33         | 13                | 33 25       | 58%       | 3612       |
| 60         | ZIC3      | X    | Q26.3      | Q28            | 19                | 24 29       | 53%       | 4001       |

**Table S7b.** Relative mutability of ten rat genes (#51-60) associated with CH

| Rat gene | gene ID   | chr* | gene locus | telomere locus | gene to tel. (Mb) | A, T ** (%) | A + T (%) | FL*** (bp) |
|----------|-----------|------|------------|----------------|-------------------|-------------|-----------|------------|
| 51       | MKS1      | 10   | 72667      | 107211         | 34.544            | 25,23       | 48        | 2480       |
| 52       | TMEM216** | 1    | 207201     | 260522         | 53.321            | 22,34       | 56        | 1310       |
| 53       | CC2D2A    | 14   | 67435      | 104886         | 37.451            | 30,26       | 56        | 7779       |
| 54       | CRB2      | 3    | 21564      | 0              | 21.564            | 14,24       | 38        | 3852       |
| 55       | HYLS1     | 8    | 33922      | 0              | 33.922            | 29,27       | 56        | 1733       |
| 56       | KIF7      | 1    | 133658     | 260522         | 126.864           | 23,18       | 41        | 4651       |
| 57       | GLI3      | 17   | 49709      | 86533          | 36.824            | 25,21       | 46        | 5027       |
| 58       | CEP83     | 7    | 29389      | 0              | 29.389            | 35,23       | 58        | 3000       |
| 59       | OFD1      | X    | 28056      | 0              | 28.056            | 33,25       | 58        | 3561       |
| 60       | ZIC3      | X    | 136134     | 152453         | 16.319            | 20,20       | 40        | 1236       |

**Table S7c.** Relative mutability of ten mouse genes (#51-60) associated with CH

| Mouse gene | gene ID   | chr* | gene locus | telomere locus | gene to tel. (Mb) | A, T ** (%) | A + T (%) | FL*** (bp) |
|------------|-----------|------|------------|----------------|-------------------|-------------|-----------|------------|
| 51         | MKS1      | 11   | 87754      | 121973         | 34.219            | 24,23       | 47        | 2516       |
| 52         | TMEM216** | 19   | 10533      | 0              | 10.533            | 21,32       | 53        | 1101       |
| 53         | CC2D2A    | 5    | 43898      | 0              | 43.898            | 30,24       | 54        | 5463       |
| 54         | CRB2      | 2    | 37689      | 0              | 37.689            | 18,24       | 42        | 6393       |
| 55         | HYLS1     | 9    | 35481      | 0              | 35.481            | 28,29       | 57        | 1643       |
| 56         | KIF7      | 7    | 79365      | 144995         | 65.63             | 23,18       | 41        | 4522       |
| 57         | GLI3      | 13   | 15904      | 0              | 15.904            | 26,26       | 52        | 8427       |
| 58         | CEP83     | 10   | 94626      | 130530         | 35.904            | 35,23       | 58        | 3006       |
| 59         | OFD1      | X    | 165223     | 169476         | 4.253             | 31,27       | 58        | 4453       |
| 60         | ZIC3      | X    | 57081      | 0              | 57.081            | 25,30       | 55        | 4035       |

**Table S8a.** Relative mutability of ten human genes (#61-70) associated with CH

| Human gene | gene ID | chr* | gene locus | telomere locus | gene to tel. (Mb) | A, T ** (%) | A + T (%) | FL*** (bp) |
|------------|---------|------|------------|----------------|-------------------|-------------|-----------|------------|
| 61         | PTEN    | 10   | Q23.31     | Q26.3          | 46                | 30 34       | 64%       | 8515       |
| 62         | FBN1    | 15   | Q21.1      | Q26.3          | 49                | 27 28       | 55%       | 11609      |
| 63         | SNX10   | 10   | P15.2      | P22.3          | 26                | 31 34       | 64%       | 2665       |
| 64         | ZIC2    | 13   | Q32.3      | Q34            | 14                | 20 23       | 43%       | 2963       |
| 65         | NF1     | 17   | Q11.2      | Q25.3          | 50                | 29 30       | 59%       | 12381      |
| 66         | HB-EGF  | 5    | Q31.3      | Q35.3          | 41                | 24 27       | 51%       | 2358       |
| 67         | NAPA    | 19   | Q13.32     | Q13.43         | 11                | 21 22       | 43%       | 1662       |
| 68         | MYH9    | 22   | Q12.3      | Q13.33         | 11                | 25 18       | 43%       | 7451       |
| 69         | HRAS    | 11   | P15.5      | P15.5          | 0.5               | 20 17       | 37%       | 1070       |
| 70         | RAF1    | 3    | P25.2      | P26.3          | 12                | 24 26       | 50%       | 3191       |

**Table S8b.** Relative mutability of ten rat genes (#61-70) associated with CH

| Rat gene | gene ID | chr* | gene locus | telomere locus | gene to tel. (Mb) | A, T ** (%) | A + T (%) | FL*** (bp) |
|----------|---------|------|------------|----------------|-------------------|-------------|-----------|------------|
| 61       | PTEN    | 1    | 230696     | 260522         | 29.826            | 33,27       | 60        | 1212       |
| 62       | FBN1    | 3    | 112750     | 169034         | 56.284            | 25,24       | 49        | 8942       |
| 63       | SNX10   | 4    | 80667      | 0              | 80.667            | 29,28       | 55        | 1423       |
| 64       | ZIC2    | 15   | 99581      | 101769         | 2.188             | 21,24       | 45        | 2903       |
| 65       | NF1     | 10   | 64539      | 107211         | 42.672            | 27,28       | 55        | 9132       |
| 66       | HB-EGF  | 18   | 28116      | 0              | 28.116            | 25,27       | 52        | 1549       |
| 67       | NAPA    | 1    | 76805      | 0              | 76.805            | 24,22       | 46        | 1504       |
| 68       | MYH9    | 7    | 109424     | 135012         | 25.588            | 26,19       | 45        | 7208       |
| 69       | HRAS    | 1    | 196299     | 260522         | 64.223            | 23,22       | 45        | 1392       |
| 70       | RAF1    | 4    | 148740     | 102640         | 46.1              | 24,26       | 50        | 2970       |

**Table S8c.** Relative mutability of ten mouse genes (#61-70) associated with CH

| Mouse gene | gene ID | chr* | gene locus | telomere locus | gene to tel. (Mb) | A, T ** (%) | A + T (%) | FL*** (bp) |
|------------|---------|------|------------|----------------|-------------------|-------------|-----------|------------|
| 61         | PTEN    | 19   | 32803      | 61420          | 28.617            | 28,32       | 60        | 8229       |
| 62         | FBN1    | 2    | 125348     | 181755         | 56.407            | 25,24       | 49        | 9900       |
| 63         | SNX10   | 6    | 51567      | 0              | 51.567            | 29,32       | 61        | 2567       |
| 64         | ZIC2    | 14   | 122717     | 125139         | 2.422             | 20,25       | 45        | 2967       |
| 65         | NF1     | 11   | 79472      | 121973         | 42.501            | 27,30       | 57        | 11847      |
| 66         | HB-EGF  | 18   | 36648      | 0              | 36.648            | 24,28       | 52        | 2392       |
| 67         | NAPA    | 7    | 15851      | 0              | 15.851            | 24,23       | 47        | 2402       |
| 68         | MYH9    | 15   | 77726      | 104073         | 26.347            | 25,19       | 46        | 7439       |
| 69         | HRAS    | 7    | 140773     | 144995         | 4.222             | 20,24       | 44        | 2043       |
| 70         | RAF1    | 6    | 115653     | 149588         | 33.935            | 24,25       | 49        | 3084       |

**Table S9a.** Relative mutability of ten human genes (#71-80) associated with CH

| Human gene | gene ID  | chr* | gene locus | telomere locus | gene to tel. (Mb) | A, T ** (%) | A + T (%) | FL*** (bp) |
|------------|----------|------|------------|----------------|-------------------|-------------|-----------|------------|
| 71         | BRAF     | 7    | Q34        | Q36.3          | 19                | 28 32       | 60%       | 6459       |
| 72         | NRAS     | 1    | P13.3      | P36.33         | 114               | 29 35       | 64%       | 4326       |
| 73         | FLNA     | X    | Q28        | Q28            | 0.1               | 21 18       | 39%       | 8533       |
| 74         | RPS6KA3  | X    | P22.12     | P22.33         | 20                | 29 33       | 62%       | 7987       |
| 75         | PIK3     | 19   | P13.11     | P13.3          | 18                | 18 19       | 37%       | 3980       |
| 76         | AKT3     | 1    | Q44        | Q44            | 5                 | 29 31       | 60%       | 7281       |
| 77         | CCND2    | 12   | P13.32     | P13.33         | 4                 | 25 30       | 55%       | 6493       |
| 78         | PIK3CA   | 3    | Q26.32     | Q29            | 19                | 32 34       | 66%       | 9259       |
| 79         | TBC1D7   | 6    | P23        | P25.3          | 13                | 23 28       | 51%       | 1282       |
| 80         | VANGL1** | 1    | P13.1      | P36.33         | 115               | 25 31       | 56%       | 8671       |

**Table S9b.** Relative mutability of ten rat genes (#71-80) associated with CH

| Rat gene | gene ID  | chr* | gene locus | telomere locus | gene to tel. (Mb) | A, T ** (%) | A + T (%) | FL*** (bp) |
|----------|----------|------|------------|----------------|-------------------|-------------|-----------|------------|
| 71       | BRAF     | 4    | 68510      | 0              | 68.51             | 27,31       | 58        | 10138      |
| 72       | NRAS     | 2    | 190593     | 249053         | 58.46             | 28,26       | 54        | 1326       |
| 73       | FLNA     | X    | 152034     | 152,453        | 0.419             | 24,23       | 47        | 8412       |
| 74       | RPS6KA3  | X    | 35623      | 0              | 35.623            | 30,32       | 62        | 7032       |
| 75       | PIK3     | 1    | 82933      | 0              | 82.933            | 22,24       | 46        | 1984       |
| 76       | AKT3     | 13   | 89225      | 106807         | 17.582            | 27,29       | 56        | 6854       |
| 77       | CCND2    | 4    | 159989     | 182687         | 22.698            | 25,24       | 49        | 1414       |
| 78       | PIK3CA   | 2    | 115249     | 0              | 115.249           | 30,30       | 60        | 6418       |
| 79       | TBC1D7   | 17   | 21548      | 0              | 21.548            | 23,26       | 49        | 1366       |
| 80       | VANGL1** | 2    | 189637     | 249053         | 59.416            | 23,25       | 48        | 2597       |

**Table S9c.** Relative mutability of ten mouse genes (#71-80) associated with CH

| Mouse gene | gene ID  | chr* | gene locus | telomere locus | gene to tel. (Mb) | A, T ** (%) | A + T (%) | FL*** (bp) |
|------------|----------|------|------------|----------------|-------------------|-------------|-----------|------------|
| 71         | BRAF     | 6    | 39702      | 0              | 39.702            | 28,30       | 58        | 9728       |
| 72         | NRAS     | 3    | 102975     | 159745         | 56.77             | 27,31       | 58        | 4470       |
| 73         | FLNA     | X    | 73293      | 0              | 73.293            | 24,23       | 47        | 8347       |
| 74         | RPS6KA3  | X    | 158151     | 169476         | 11.325            | 29,31       | 60        | 7320       |
| 75         | PIK3     | 7    | 27340      | 0              | 27.34             | 22,25       | 47        | 4375       |
| 76         | AKT3     | 1    | 177091     | 195154         | 18.063            | 27,31       | 58        | 6789       |
| 77         | CCND2    | 6    | 127131     | 149588         | 22.457            | 24,29       | 53        | 5772       |
| 78         | PIK3CA   | 3    | 32520      | 0              | 32.52             | 29,29       | 58        | 6987       |
| 79         | TBC1D7   | 13   | 43324      | 0              | 43.324            | 24,25       | 49        | 1248       |
| 80         | VANGL1** | 3    | 102112     | 159745         | 57.633            | 24,27       | 51        | 4214       |

**Table S10a.** Relative mutability of ten human genes (#81-90) associated with CH

| Human gene | gene ID   | chr* | gene locus | telomere locus | gene to tel. (Mb) | A, T ** (%) | A + T (%) | FL*** (bp) |
|------------|-----------|------|------------|----------------|-------------------|-------------|-----------|------------|
| 81         | VANGL2*** | 1    | Q23.2      | Q44            | 88                | 19 29       | 38%       | 5354       |
| 82         | CCL2      | 17   | Q12        | Q13.3          | 34                | 29 31       | 60%       | 741        |
| 83         | FUZ       | 19   | Q13.33     | Q13.43         | 9                 | 18 21       | 39%       | 1728       |
| 84         | MPDZ      | 9    | P23        | P24.3          | 13                | 30 27       | 57%       | 7734       |
| 85         | ARHGAP31# | 3    | Q13.32     | Q29            | 79                | 27 24       | 51%       | 9307       |
| 86         | GPSM2     | 1    | P13.3      | P36.33         | 108               | 31 29       | 60%       | 7152       |
| 87         | ARSB*     | 5    | Q14.1      | Q15.33         | 78                | 25 29       | 54%       | 4852       |
| 88         | GBA##     | 1    | Q21.3      | Q44            | 93                | 22 24       | 46%       | 2291       |
| 89         | FGFR2     | 10   | Q26.13     | Q26.3          | 12                | 26 26       | 52%       | 4624       |
| 90         | FGFR3     | 4    | P16.3      | P16.3          | 1                 | 18 21       | 39%       | 4301       |

**Table S10b.** Relative mutability of ten rat genes (#81-90) associated with CH

| Rat gene | gene ID   | chr* | gene locus | telomere locus | gene to tel. (Mb) | A, T ** (%) | A + T (%) | FL*** (bp) |
|----------|-----------|------|------------|----------------|-------------------|-------------|-----------|------------|
| 81       | VANGL2*** | 13   | 84489      | 106807         | 22.318            | 19,24       | 43        | 2813       |
| 82       | CCL2      | 10   | 67007      | 107211         | 40.204            | 30,30       | 60        | 780        |
| 83       | FUZ       | 1    | 95384      | 0              | 95.384            | 20,22       | 42        | 1448       |
| 84       | MPDZ      | 5    | 95920      | 166875         | 70.955            | 28,25       | 53        | 7516       |
| 85       | ARHGAP31# | 11   | 62151      | 86241          | 24.09             | 25,20       | 45        | 4566       |
| 86       | GPSM2     | 2    | 196375     | 249053         | 52.678            | 28,25       | 53        | 2516       |
| 87       | ARSB*     | 2    | 25162      | 0              | 25.162            | 22,22       | 44        | 1862       |
| 88       | GBA##     | 2    | 174615     | 249053         | 74.438            | 23,25       | 48        | 2159       |
| 89       | FGFR2     | 1    | 184850     | 260522         | 75.672            | 26,24       | 50        | 4654       |
| 90       | FGFR3     | 14   | 77002      | 104886         | 27.884            | 21,24       | 45        | 4203       |

**Table S10c.** Relative mutability of ten mouse genes (#81-90) associated with CH

| Mouse gene | gene ID   | chr* | gene locus | telomere locus | gene to tel. (Mb) | A, T ** (%) | A + T (%) | FL*** (bp) |
|------------|-----------|------|------------|----------------|-------------------|-------------|-----------|------------|
| 81         | VANGL2*** | 1    | 171856     | 195154         | 23.298            | 21,27       | 48        | 5714       |
| 82         | CCL2      | 11   | 81928      | 121973         | 40.045            | 28,29       | 57        | 806        |
| 83         | FUZ       | 7    | 44550      | 0              | 44.55             | 20,22       | 42        | 1684       |
| 84         | MPDZ      | 4    | 81361      | 156860         | 75.499            | 28,25       | 53        | 7526       |
| 85         | ARHGAP31# | 16   | 38533      | 0              | 38.533            | 26,22       | 48        | 7722       |
| 86         | GPSM2     | 3    | 108629     | 159745         | 51.116            | 29,25       | 54        | 3510       |
| 87         | ARSB*     | 13   | 94079      | 120883         | 26.804            | 23,27       | 50        | 3989       |
| 88         | GBA##     | 3    | 89116      | 159745         | 70.629            | 22,26       | 48        | 2142       |
| 89         | FGFR2     | 7    | 129868     | 144995         | 15.127            | 25,26       | 51        | 5223       |
| 90         | FGFR3     | 5    | 33894      | 0              | 33.894            | 21,24       | 45        | 4219       |

**Table S11a.** Relative mutability of ten human genes (#91-100) associated with CH

| Human gene | gene ID         | chr* | gene locus | telomere locus | gene to tel. (Mb) | A, T ** (%) | A + T (%) | FL*** (bp) |
|------------|-----------------|------|------------|----------------|-------------------|-------------|-----------|------------|
| 91         | SKI             | 1    | P36.33     | P36.33         | 2                 | 18 21       | 39%       | 6083       |
| 92         | TGFBR1          | 9    | Q22.32     | Q34.3          | 39                | 28 34       | 62%       | 6492       |
| 93         | MAF             | 16   | Q23.2      | Q24.3          | 11                | 21 19       | 40%       | 2669       |
| 94         | APOE            | 19   | 44 Mb      | 58             | 14                | 18,14       | 32        | 1166       |
| 95         | APP             | 21   | 25Mb       | 46             | 29                | 23,19       | 42        | 1018       |
| 96         | Tau/mapt        | 17q  | 45 Mb      | 83             | 18                | 22,23       | 45        | 5811       |
| 97         | PSEN1           | 14q  | 73Mb       | 107            | 34                | 26,31       | 57        | 6018       |
| 98         | PSEN2           | 11   | 226Mb      | 247            | 21                | 21,25       | 46        | 2249       |
| 99         | BIN1 a/ stg3    | 2q   | 127Mb      | 242            | 115               | 22,19       | 41        | 2070       |
| 100        | Cyp27c1 a/ stg3 | 2q   | 127mb      | 242            | 115               | 29,27       | 56        | 4685       |

**Table S11b.** Relative mutability of ten rat genes (#91-100) associated with CH

| Rat gene | gene ID         | chr* | gene locus | telomere locus | gene to tel. (Mb) | A, T ** (%) | A + T (%) | FL*** (bp) |
|----------|-----------------|------|------------|----------------|-------------------|-------------|-----------|------------|
| 91       | SKI             | 5    | 165782     | 166875         | 1.093             | 20,24       | 44        | 5584       |
| 92       | TGFBR1          | 5    | 61710      | 0              | 61.71             | 26,33       | 59        | 5724       |
| 93       | MAF             | 19   | 43713      | 57337          | 13.624            | 18,21       | 39        | 1945       |
| 94       | APOE            | 1    | 79357      | 0              | 79.357            | 24,16       | 40        | 1172       |
| 95       | APP             | 11   | 24236      | 0              | 24.236            | 26,21       | 47        | 2340       |
| 96       | Tau/mapt        | 10   | 89236      | 107211         | 17.975            | 24,24       | 48        | 5149       |
| 97       | PSEN1           | 6    | 103375     | 140994         | 37.619            | 24,27       | 51        | 1407       |
| 98       | PSEN2           | 13   | 91993      | 106807         | 14.814            | 23,24       | 49        | 1628       |
| 99       | BIN1 a/ stg3    | 18   | 24067      | 0              | 24.067            | 23,20       | 43        | 2399       |
| 100      | Cyp27c1 a/ stg3 | 9    | 76294      | 114175         | 37.881            | 23,24       | 47        | 2150       |

**Table S11c.** Relative mutability of ten mouse genes (#91-100) associated with CH

| Mouse gene | gene ID         | chr* | gene locus | telomere locus | gene to tel. (Mb) | A, T ** (%) | A + T (%) | FL*** (bp) |
|------------|-----------------|------|------------|----------------|-------------------|-------------|-----------|------------|
| 91         | SKI             | 4    | 155306     | 156860         | 1.554             | 22,24       | 46        | 5481       |
| 92         | TGFBR1          | 4    | 47414      | 0              | 47.414            | 27,33       | 60        | 5779       |
| 93         | MAF             | 8    | 116433     | 130127         | 13.694            | 26,28       | 54        | 3642       |
| 94         | APOE            | 7    | 19M        | 143 M          | 124               | 23,18       | 41        | 1288       |
| 95         | APP             | 16   | 84m        | 98m            | 14                | 27,23       | 50        | 3152       |
| 96         | Tau/mapt        | 11   | 104        | 121            | 17                | 24,25       | 49        | 5164       |
| 97         | PSEN1           | 12   | 83         | 120            | 37                | 25,25       | 50        | 2706       |
| 98         | PSEN2           | 1    | 180        | 195            | 15                | 22,25       | 47        | 2026       |
| 99         | BIN1 a/ stg3    | 18   | 32         | 90             | 58                | 23,20       | 43        | 2468       |
| 100        | Cyp27c1 a/ stg3 | 1    | 74         | 195            | 121               | 24,23       | 47        | 1936       |



**References for supplementary material**

Morton, N.E. (1991). Parameters of the human genome. *Proc Natl Acad Sci U S A* 88, 7474-7476.
